# Supplementary material for: Influence of the Active Layer Structure on the Photovoltaic Performance of Water-Soluble Polythiophene-Based Solar Cells
Source: MDPI journal article supplement (doi:10.3390/polym13101640), 2021-05-18
Supplement: s1 [file s1]

# Influence of the Active Layer Structure on the Photovoltaic Performance of Water-Soluble Polythiophene-Based Solar Cells

Massimiliano Lanzi <sup>1,2\*</sup>, Debora Quadretti <sup>1</sup>, Martina Marinelli <sup>1,3</sup>, Yasamin Ziai <sup>3</sup>, Elisabetta Salatelli <sup>1</sup> and Filippo Pierini <sup>3</sup>

<sup>1</sup> Department of Industrial Chemistry “Toso Montanari”, University of Bologna, Viale Risorgimento 4, 40136 Bologna, Italy; debora.quadretti2@unibo.it (D.Q.); martina.marinelli5@unibo.it (M.M.); elisabetta.salatelli@unibo.it (E.S.)

<sup>2</sup> INSTM-National Interuniversity Consortium of Materials Science and Technology, Via G. Giusti 9, 50121 Firenze, Italy; massimiliano.lanzi@unibo.it (M.L.)

<sup>3</sup> Department of Biosystem and Soft Matter, Institute of Fundamental Technological Research, IPPT-PAN, Polish Academy of Science, ul. Pawinskiego 5B, 02-106 Warsaw, Poland; yzai@ippt.pan.pl (Y.Z.); fpierini@ippt.pan.pl (F.P.)

\* Correspondence: massimiliano.lanzi@unibo.it

**Table S1.** Study of PT6Br synthesis by GRIM reaction: chemical shift (ppm) and assignments of the three samples collected at different times.

| <i>A</i><br>(30 min) | <i>B</i><br>(60 min) | <i>C</i><br>(90 min) | <i>Assignment</i>                                                                    | <i>Ref.</i> |
|----------------------|----------------------|----------------------|--------------------------------------------------------------------------------------|-------------|
| 7.19                 | 7.19                 | -                    | 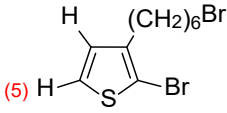 | [31]        |
| -                    | 7.00                 | -                    |  |             |
| -                    | 6.98                 | 6.98                 |  | [32]        |
| -                    | 6.91                 | -                    |  | [33]        |
| 6.88                 | 6.88                 | -                    |  | [31]        |

|      |      |      |                                                                                      |         |
|------|------|------|--------------------------------------------------------------------------------------|---------|
| -    | 6.87 | -    | 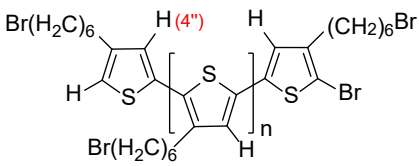   | [34]    |
| -    | 6.81 | -    |    | [35,36] |
| 6.79 | 6.79 | -    |    | [31]    |
| -    | -    | 3.43 |    |         |
| 3.41 | 3.41 |      |   |         |
| -    | 2.83 | 2.83 |  | [32]    |
| -    | 2.65 | -    |  | [33,34] |

|      |            |      |                                                                                     |  |
|------|------------|------|-------------------------------------------------------------------------------------|--|
| -    | 2.39       | -    | 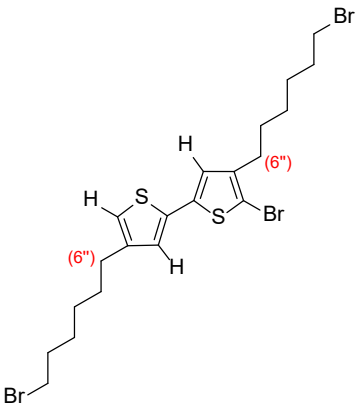  |  |
| 1.86 | 1.86       | 1.90 |   |  |
| 1.56 | 1.56, 1.73 | 1.73 |   |  |
| 1.47 | 1.47       | 1.49 |   |  |
| 1.36 | 1.36       | 1.49 |  |  |

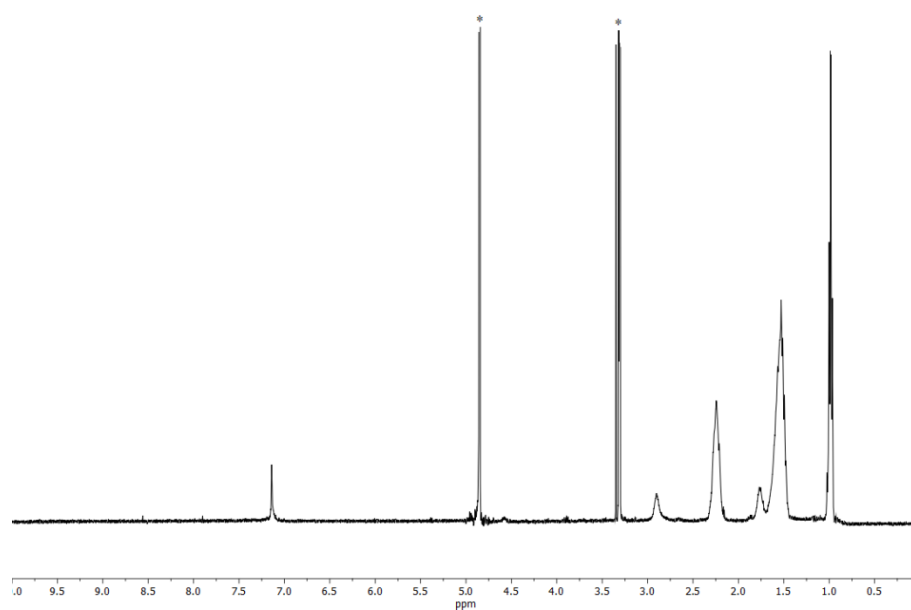

**Figure S1.**  $^1\text{H}$ -NMR spectrum of PT6buP $^+$ . Asterisk: solvent resonance ( $\text{CD}_3\text{OD}$ ).

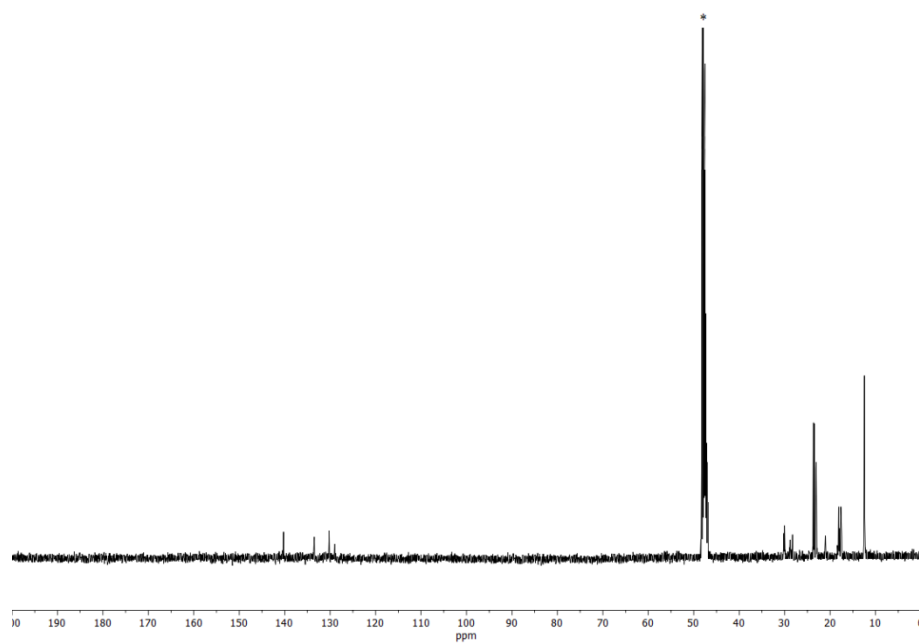

**Figure S2.**  $^{13}\text{C}$ -NMR spectrum of  $\text{PT6buP}^+$ . Asterisk: solvent resonance ( $\text{CD}_3\text{OD}$ ).

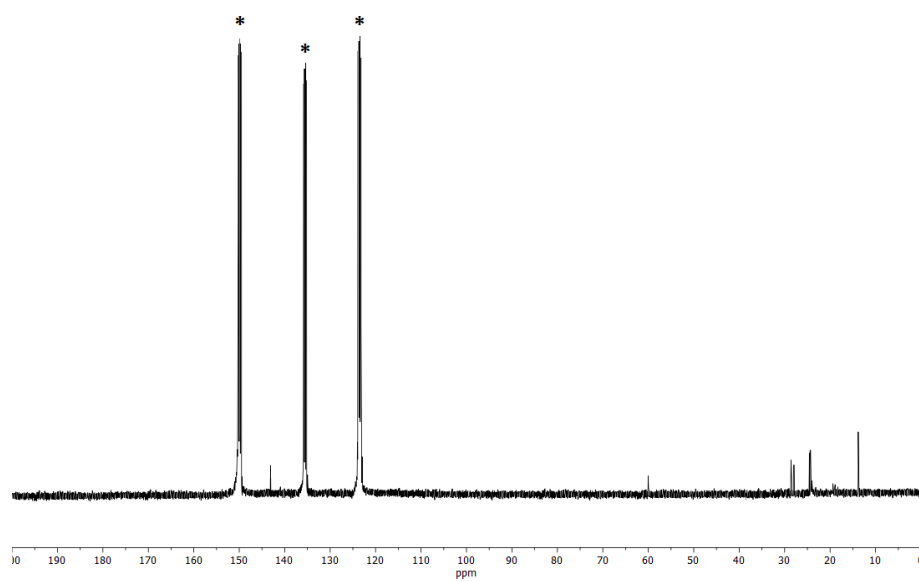

**Figure S3.**  $^{13}\text{C}$ -NMR of  $\text{P}[(\text{T6buP}^+)-\text{co}-(\text{T6F})]$ . Asterisk: solvent resonance ( $\text{pyridine-d}_5$ ).

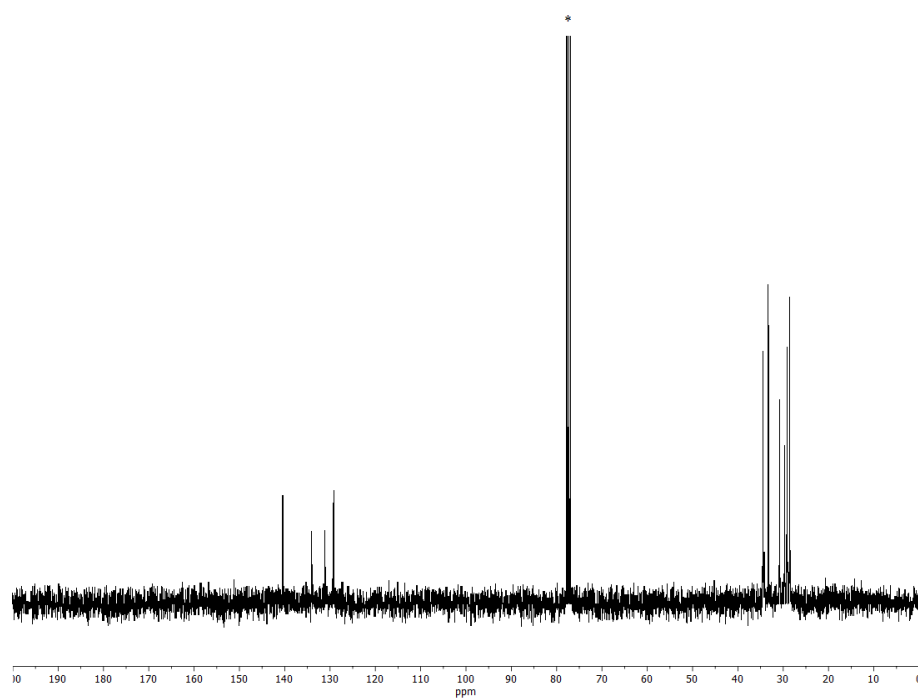

**Figure S4.**  $^{13}\text{C}$ -NMR spectrum of PT6Br. Asterisk: solvent resonance ( $\text{CDCl}_3$ ).

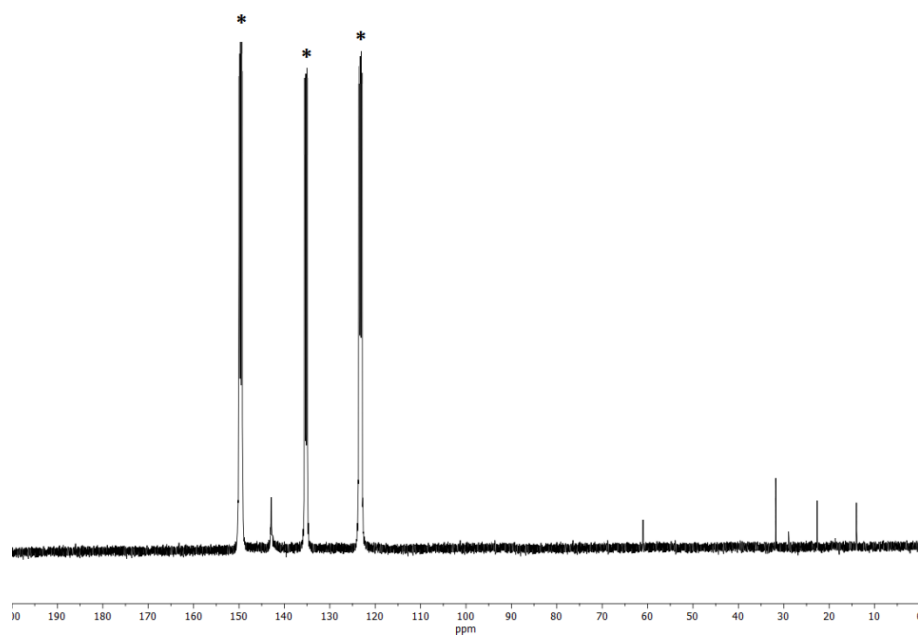

**Figure S5.**  $^{13}\text{C}$ -NMR spectrum of P[(T6Br)-co-(T6F)]. Asterisk: solvent resonance ( $\text{pyridine-d}_5$ ).

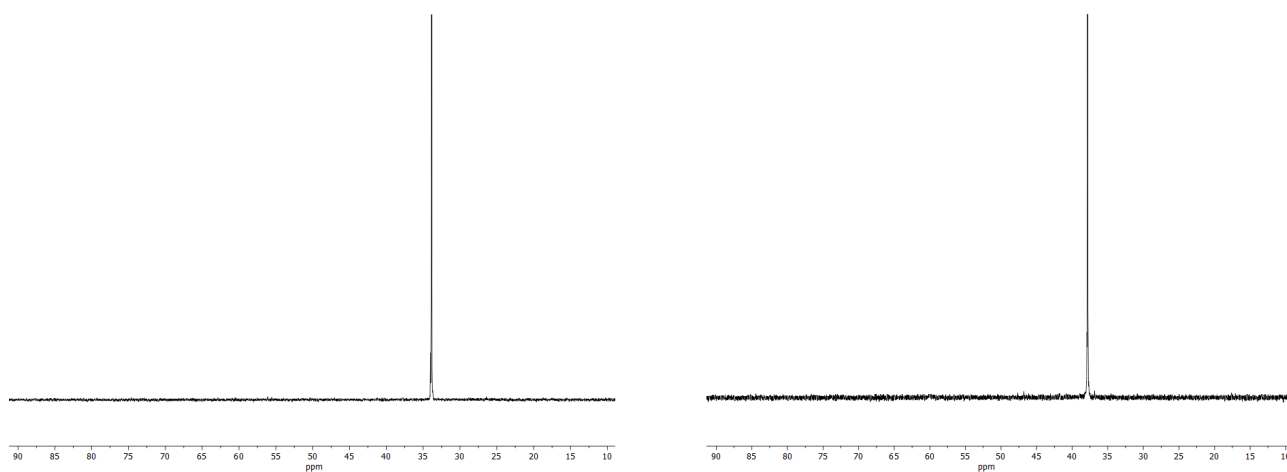

**Figure S6.**  $^{31}\text{P}$ -NMR spectra of PT6buP<sup>+</sup> (left) and P[(T6buP<sup>+</sup>)-co-(T6F)] (right) recorded in  $\text{CD}_3\text{OD}$ .

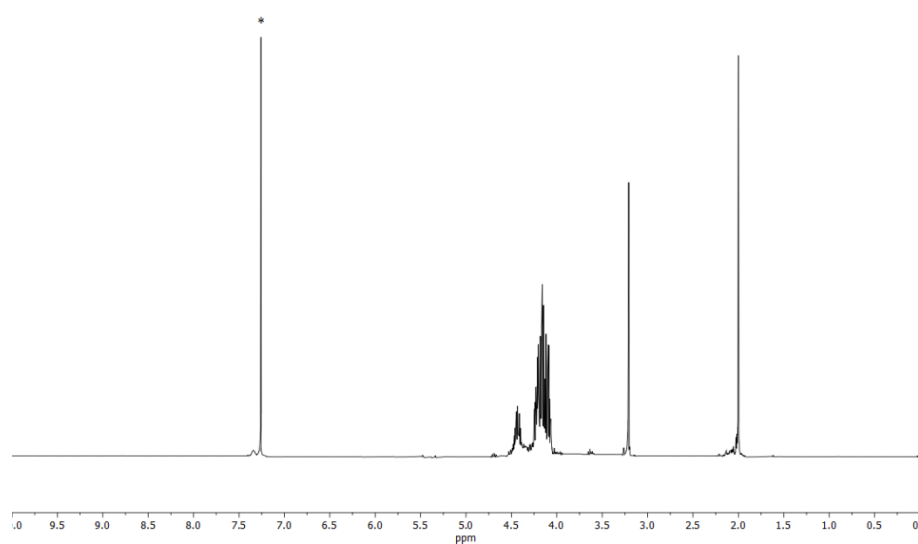

**Figure S7.**  $^1\text{H}$ -NMR spectrum of P-Ser. Asterisk: solvent resonance ( $\text{CDCl}_3$ ).

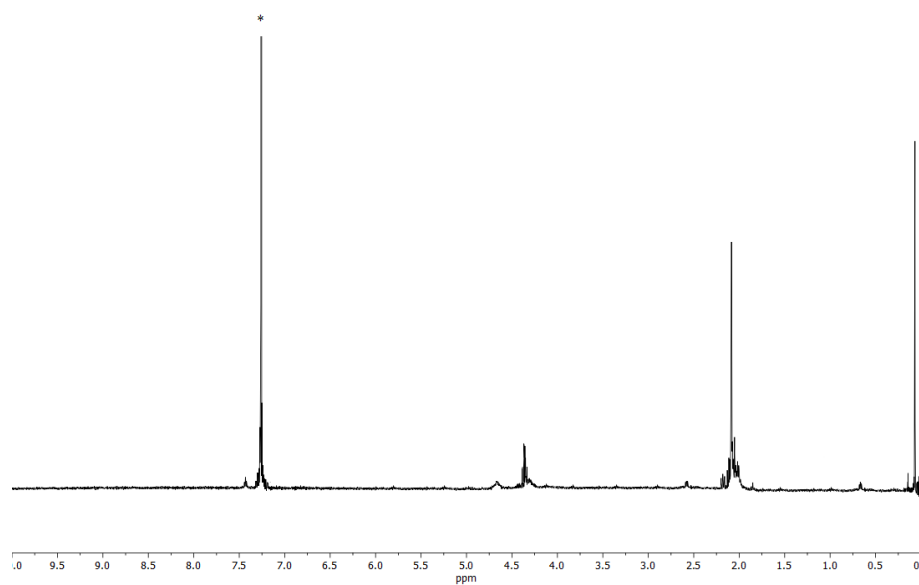

**Figure S8.** <sup>1</sup>H-NMR spectrum of PC<sub>60</sub>-Ser. Asterisk: solvent resonance (CDCl<sub>3</sub>).

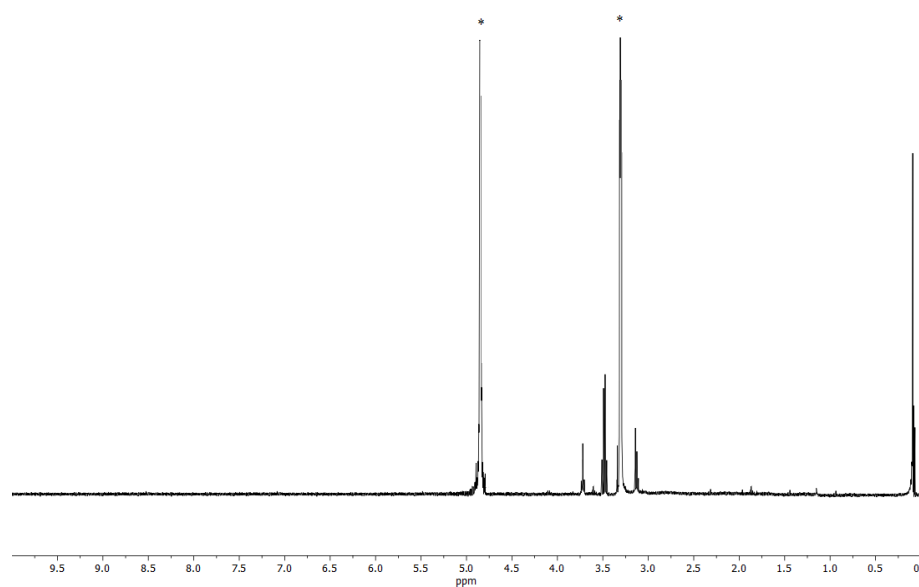

**Figure S9.** <sup>1</sup>H-NMR spectrum of C<sub>60</sub>-Ser. Asterisk: solvent resonance (CD<sub>3</sub>OD).

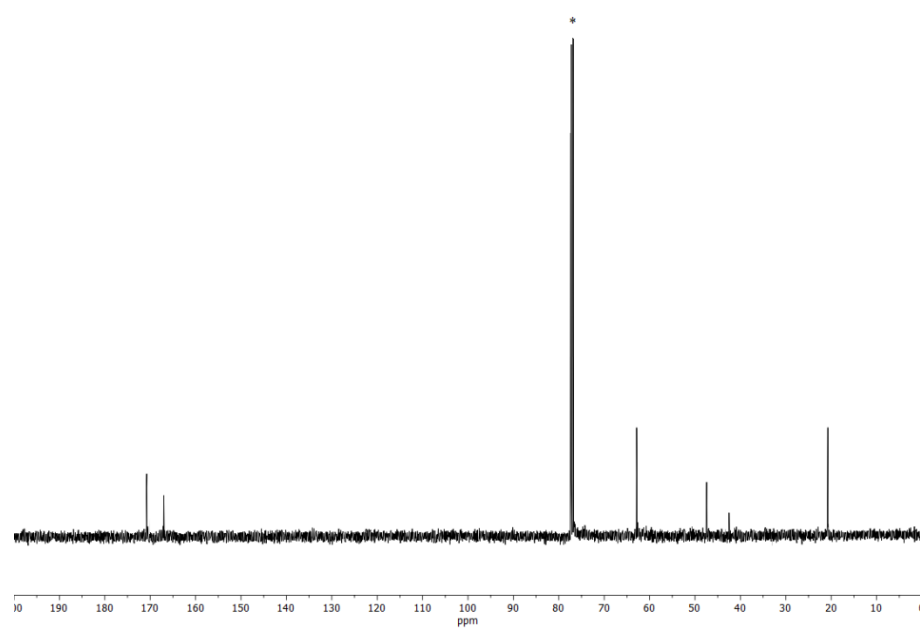

**Figure S10.**  $^{13}\text{C}$ -NMR of P-Ser. Asterisk: solvent resonance ( $\text{CDCl}_3$ ).

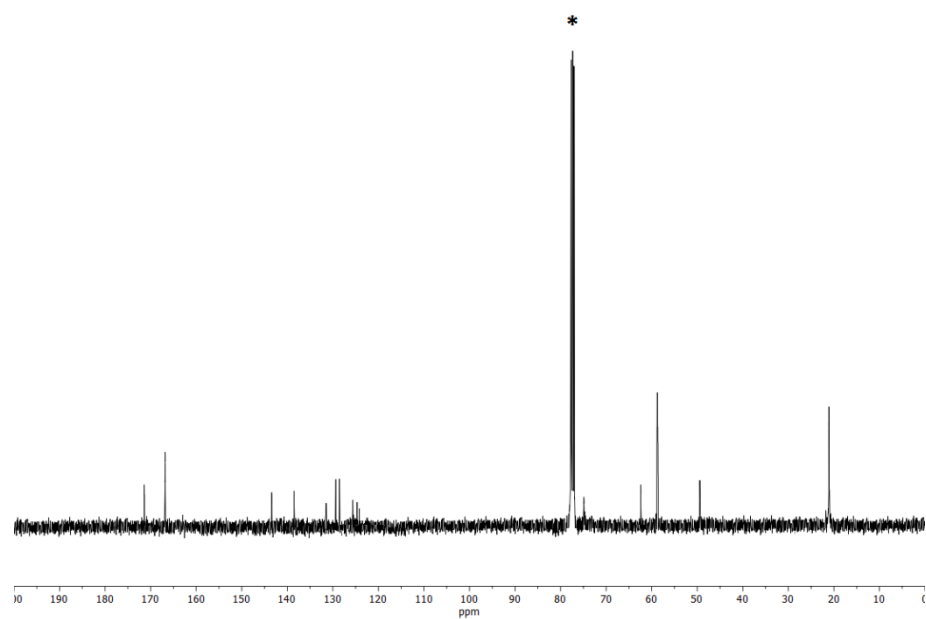

**Figure S11.**  $^{13}\text{C}$ -NMR of  $\text{PC}_{60}$ -Ser. Asterisk: solvent resonance ( $\text{CDCl}_3$ ).



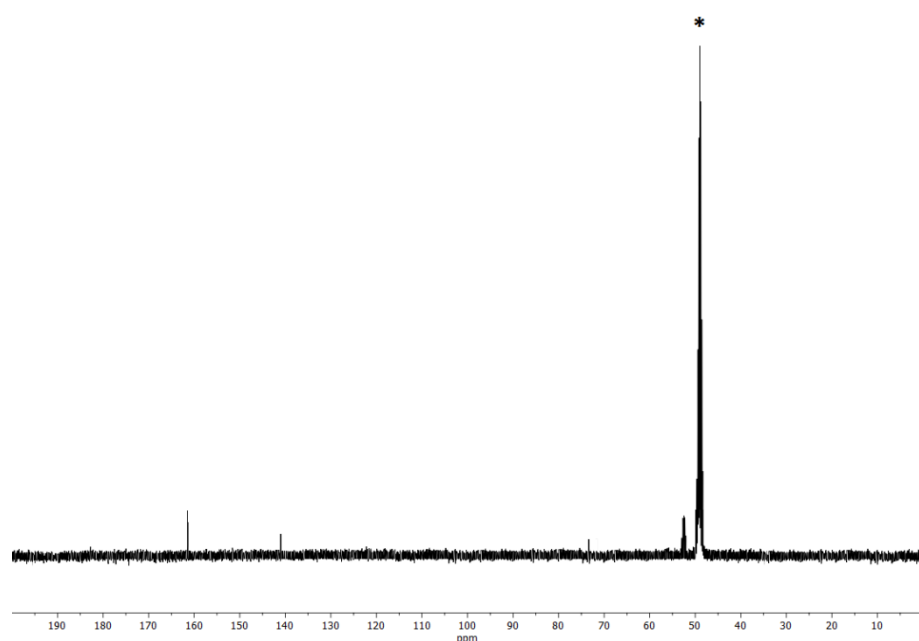

**Figure S12.**  $^{13}\text{C}$ -NMR of  $\text{C}_{60}$ -Ser. Asterisk: solvent resonance (\*).

**Table S2.** Main IR absorption bands ( $\text{cm}^{-1}$ ) of homo-polymers and double-cable copolymers.

| <i>PT6Br</i> | <i>PT6buP<sup>+</sup></i> | <i>P[(T6Br)-co-(T6F)]</i> | <i>P[(T6buP<sup>+</sup>)-co-(T6F)]</i> | <i>Assignment</i>                                                                       |
|--------------|---------------------------|---------------------------|----------------------------------------|-----------------------------------------------------------------------------------------|
| 3058         | 3053                      | 3053                      | 3052                                   | $\nu$ C-H $\beta$ thiophene                                                             |
| -            | 2957                      | -                         | 2956                                   | $\nu_{\text{as}}$ -CH <sub>3</sub> (phosphonium group)                                  |
| 2923         | 2929                      | 2918                      | 2927                                   | $\nu_{\text{as}}$ -CH <sub>2</sub> - (side chain and phosphonium group)                 |
| 2852         | 2870                      | 2849                      | 2869                                   | $\nu_{\text{sym}}$ -CH <sub>2</sub> - and -CH <sub>3</sub>                              |
| 1508         | 1513                      | 1509                      | 1514                                   | $\nu_{\text{as}}$ -C=C- thiophene                                                       |
| 1434         | 1463                      | 1452                      | 1461                                   | -CH <sub>2</sub> - deformation (phosphonium group) and $\nu_{\text{sym}}$ C=C thiophene |
| -            | -                         | 1428                      | 1427                                   | fullerene                                                                               |
| -            | 1410                      | -                         | 1408                                   | $\gamma_{\text{as}}$ P-CH <sub>2</sub> -R                                               |
| 1384         | -                         | 1384                      | -                                      | -CH <sub>3</sub> deformation                                                            |
| -            | 1378                      | -                         | 1379                                   | -CH <sub>3</sub> deformation (phosphonium group)                                        |
| 1259         | 1232                      | 1257                      | 1228                                   | $\nu$ C-C thiophene-thiophene                                                           |
| -            | -                         | 1181                      | 1180                                   | fullerene                                                                               |
| 1089         | 1099                      | 1099                      | 1096                                   | $\delta$ -CH thiophene                                                                  |
| 800          | 833                       | 826                       | 808                                    | $\gamma$ C-H thiophene 2, 3, 5-trisubstituted                                           |
| 725          | 723                       | 722                       | 721                                    | rocking -CH <sub>2</sub> -                                                              |
| 641, 558     | -                         | 644, 557                  | -                                      | $\nu$ C-Br aliphatic                                                                    |
| -            | -                         | 562, 526                  | 576, 526                               | fullerene                                                                               |

**Table S3.** Main IR absorption bands (cm<sup>-1</sup>) of P-Ser, PC<sub>60</sub>-Ser and C<sub>60</sub>-Ser.

| <i>P-Ser</i> | <i>PC<sub>60</sub>-Ser</i> | <i>C<sub>60</sub>-Ser</i> | <i>Assignment</i>              |
|--------------|----------------------------|---------------------------|--------------------------------|
| 3301         | 3289                       | 3405                      | $\nu$ N-H                      |
| 2961         | 2926                       | 2948                      | $\nu_{as}$ -CH <sub>2</sub> -  |
| 2902         | 2853                       | 2623                      | $\nu_{sym}$ -CH <sub>2</sub> - |
| 1737         | 1739                       | -                         | $\nu$ C=O ester                |
| 1661         | 1646                       | 1649                      | Amide I band, $\nu$ C-O        |
| 1537         | 1543                       | -                         | Amide II band, $\delta$ N-H    |
| -            | 1428                       | 1429                      | fullerene                      |
| -            | -                          | 1401                      | $\gamma$ OH                    |
| 1370         | 1366                       | 1371                      | Amide III band, $\nu$ C-N      |
| 1242         | 1228                       | -                         | $\nu_{as}$ -OCOCH <sub>3</sub> |
| -            | 1180                       | 1182                      | fullerene                      |
| -            | 561, 526                   | 576, 526                  | fullerene                      |

$\nu$  = stretching;  $\gamma$  = out of plane bending;  $\delta$  = in-plane bending.

### Thermal properties

#### TGA analyses

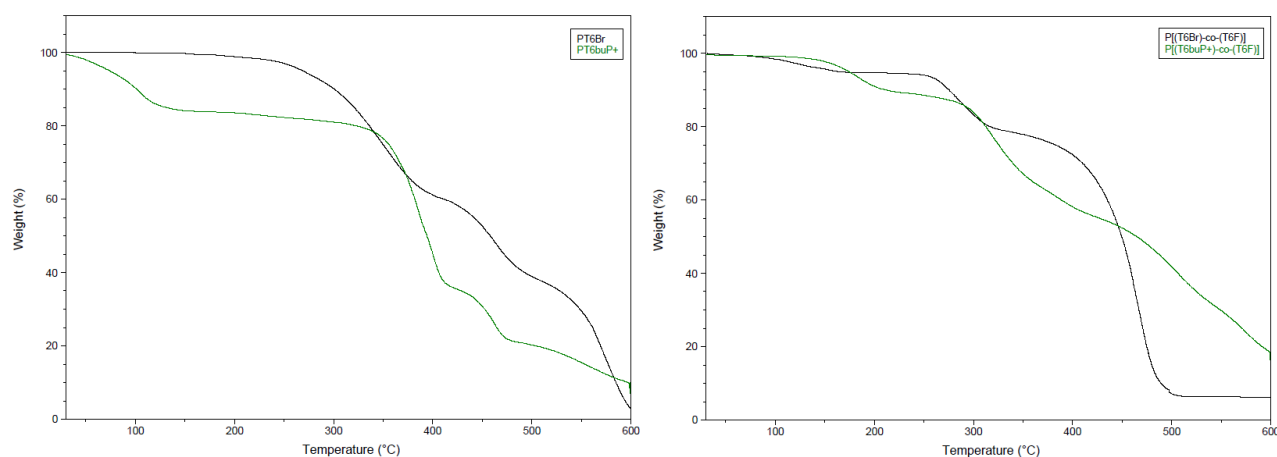**Figure S13.** TGA thermograms of homo- (PT6Br and PT6buP<sup>+</sup>, left) and co-polymers (P[(T6Br)-co-(T6F)] and P[(T6buP<sup>+</sup>)-co-(T6F)], right).

#### DSC analyses

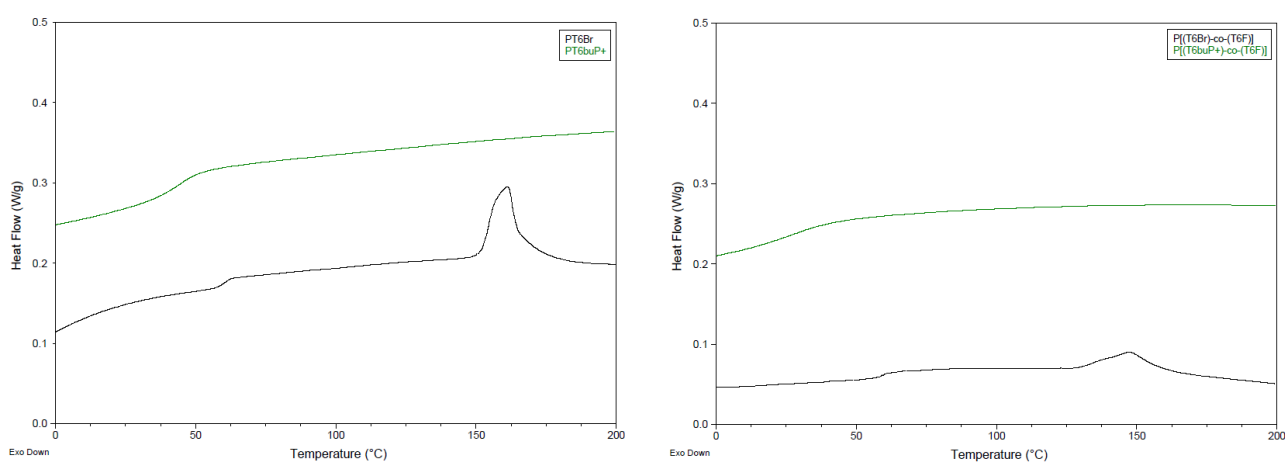**Figure S14.** DSC thermograms of homo- (PT6Br and PT6buP<sup>+</sup>, left) and co-polymers (P[(T6Br)-co-(T6F)] and P[(T6buP<sup>+</sup>)-co-(T6F)], right).
